# Supplementary material
Source: PubMed Central journal article supplement (PMC5394876)
Supplement: 2a5fcc5596bfca0c3cff2e591e2cfb9c_2016_147090-Disclosures_and_Contributions.pdf [file 2a5fcc5596bfca0c3cff2e591e2cfb9c_2016_147090-Disclosures_and_Contributions.pdf]

Haematologica  
HAEMATOL/2016/147090  
Version 3

Mutating heme oxygenase-1 into a peroxidase causes a defect in bilirubin synthesis associated with microcytic anemia and severe hyperinflammation

Johann Greil, Maria V. Verga-Falzacappa, Nicole E. Echner, Wolfgang Behnisch, Obul R. Bandapalli, Paulina Pechanska, Stephan Immenschuh, Vijith Vijayan, Jozsef Balla, Hirokatsu Tsukahara, Marion Schneider, Gritta Janka, Maren Claus, Thomas Longerich, Martina U. Muckenthaler, and Andreas Kulozik

Disclosures: none

Contributions: J.G., W.B. and A.E.K. documented the clinical phenotype of the index patient, M.V. V.-F., O.R.B, P.P., N.E.D., V.V., J.B., H.T. , M.S., T.L. and M.C. performed experiments; J.G., W.B., A.E.K., G.J. and H.H. performed hematological analyses, J.G., J.B., G.J., H.H., J.B., H.T., S.I., M.U.M. and A.E.K analyzed results; J.G.,M.U.M. and A.E.K. designed the research and wrote the paper.
